# Supplementary material for: Effects of senescence and angiotensin II on expression and processing of amyloid precursor protein in human cerebral microvascular endothelial cells
Source: PubMed Central journal article supplement (PMC5811245; doi:10.18632/aging.101362), 2018-01-15
Supplement: aging-10-101362-s001.pdf [file aging-10-101362-s001.pdf]

**SUPPLEMENTARY MATERIAL**

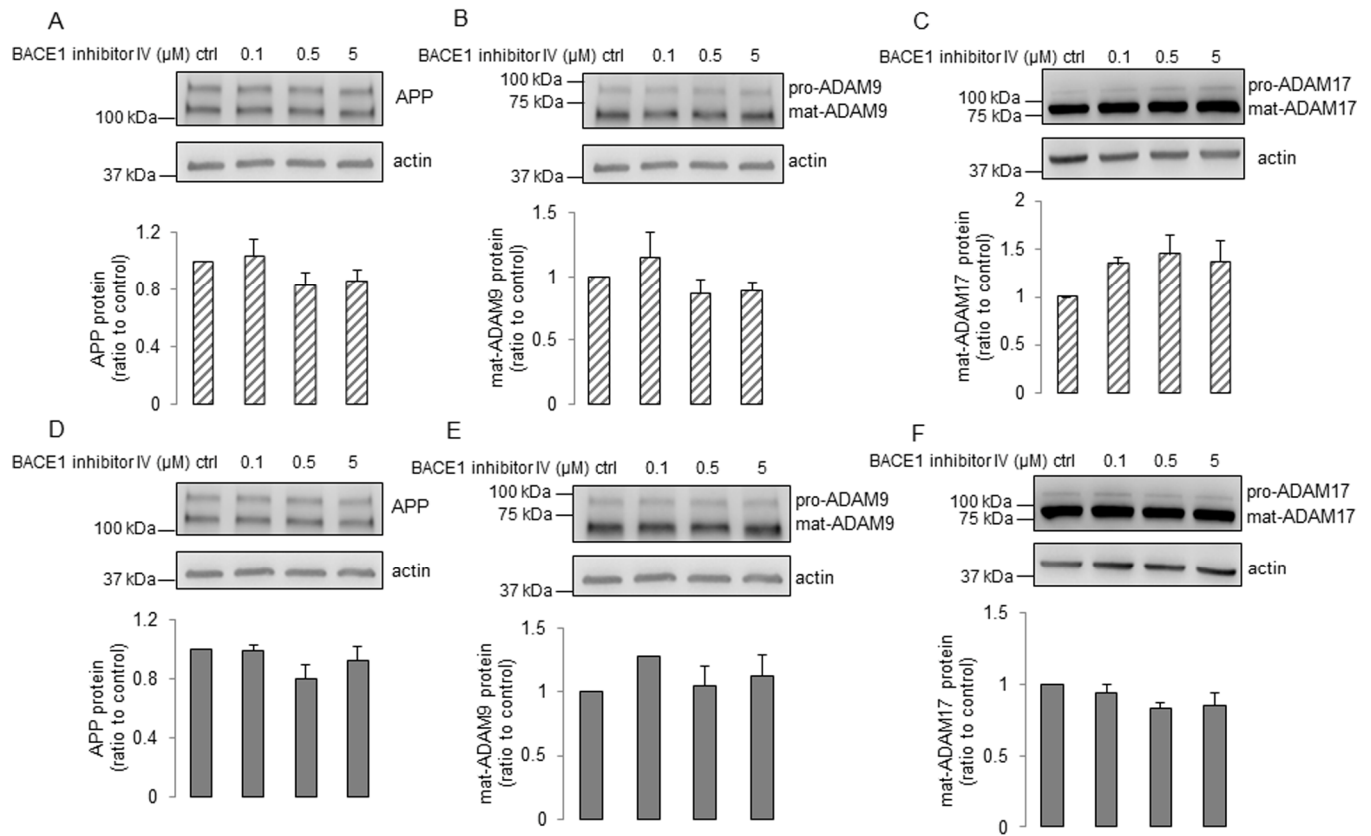

**Supplementary Figure 1.** APP, ADAM9 and ADAM17 protein levels were unchanged by BACE1 inhibitor IV treatment of young and senescent human BMECs. P5 cells (A, B and C) and P15 cells (D, E and F) were treated with BACE1 inhibitor IV with indicated concentrations for 24h. Cell lysates were subjected to Western blot. Protein levels of APP (A and D, n=5), ADAM9 (B and E, n=3) and ADAM17 (C and F, n=3) were measured. Data are presented as mean±SEM.

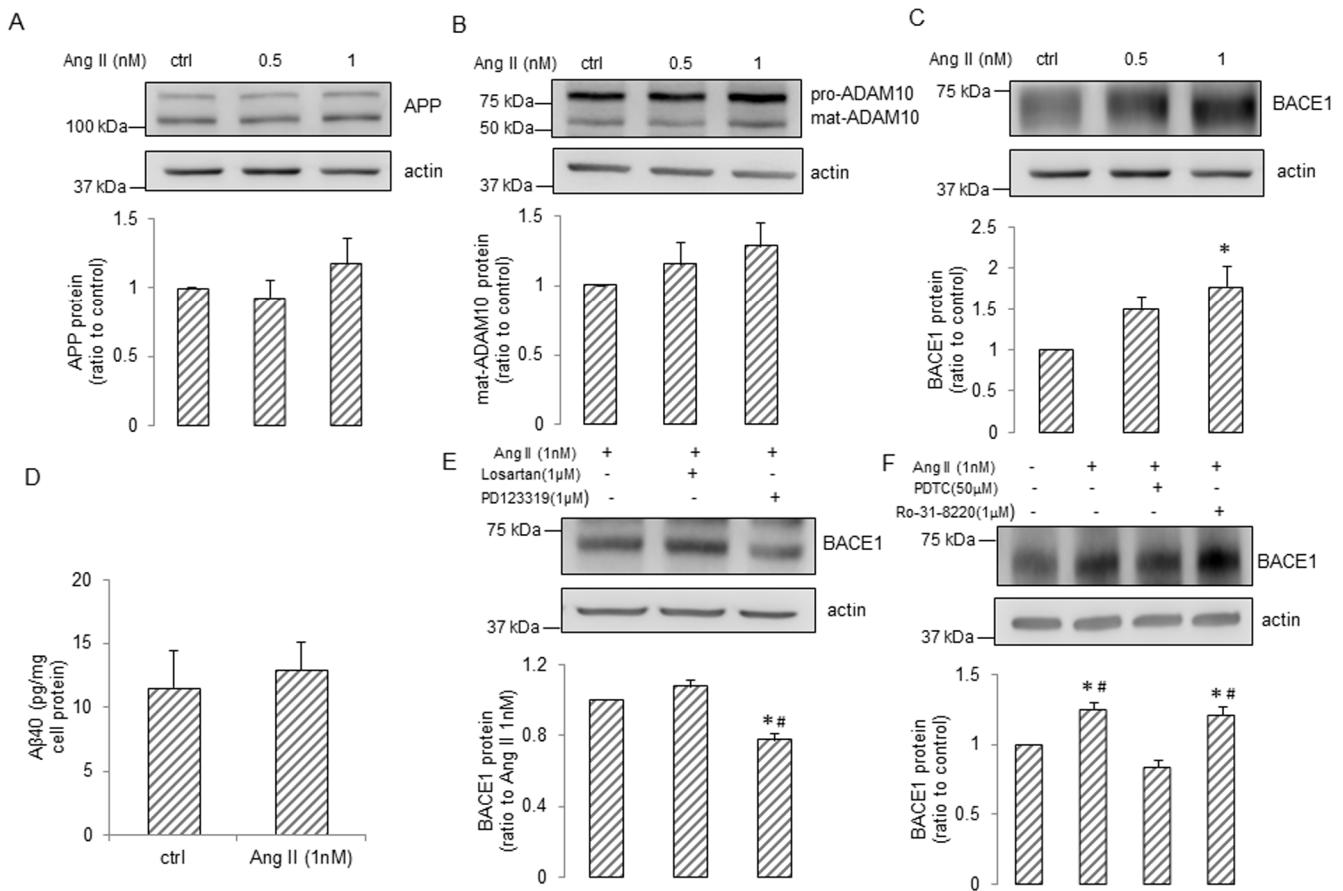

**Supplementary Figure 2. The effects of Ang II on expression and processing of APP in young human BMECs.** P5 cells were treated with Ang II with indicated concentrations for 24h. Cell lysates were subjected to Western blot. Protein levels of (A) APP, n=7-9, (B) ADAM10, n=7-9 and (C) BACE1, n=9-14 were measured. \*P<0.05, compared to control. (D) BMECs were cultured in the absence or presence of 1nM Ang II for 24h. Conditioned media (2ml) were collect for measuring Aβ40 via a commercially available ELISA kit, n=11. (E) Cells were treated with losartan (10<sup>-6</sup>M) or PD123319 (10<sup>-6</sup>M) for 1h, and then incubated with Ang II (1nM) for 24h. BACE1 expression was measured, n=7. \*P<0.05, compared to Ang II (1nM), #P<0.05, compared to Ang II (1nM) plus losartan (10<sup>-6</sup>M). (F) Cells were treated with PDTC (50μM) or Ro-31-8220 (1μM) for 1h, and then incubated with Ang II (1nM) for 24h. BACE1 expression was measured, n=6. \*P<0.05, compared to control, #P<0.05, compared to Ang II (1nM) plus PDTC (50μM). Data are presented as mean±SEM.
